# Supplementary material for: Survivors Overcoming and Achieving Resiliency (SOAR): Mindful Eating Practice for Breast Cancer Survivors in a Virtual Teaching Kitchen
Source: MDPI journal article supplement (doi:10.3390/nu15194205), 2023-09-29
Supplement: s1 [file s1]

## SUPPLEMENTAL MATERIAL

**Table S1:** Topics, Objectives, Activities and Recipes for Each SOAR Session.

| Session | Topic                         | Objective                                                                                                                 | Expert / Session Leader                | Activity                                                                                                                                                  | Plant-based Recipes           |
|---------|-------------------------------|---------------------------------------------------------------------------------------------------------------------------|----------------------------------------|-----------------------------------------------------------------------------------------------------------------------------------------------------------|-------------------------------|
| 1       | Emotional Health & Well-being | Identify coping strategies essential to managing the stress, anxiety and depression common after a cancer diagnosis.      | Licensed Clinical Social Worker        | Journal and reflect on where you are in your cancer journey. Discuss coping strategies and when it's time to ask for help                                 | Creamy cilantro lime dressing |
| 2       | Nutrition for Survivors       | Learn the science behind nutrition and cancer survivorship.                                                               | Registered Dietitian                   | Separate on-line fact from fiction to maintain and improve health and survival. Journal and reflect on 1-2 dietary changes to move towards the AICR goals | Colorful lentil soup          |
| 3       | Virtual Teaching Kitchen #1   | Overcome barriers to consuming fish                                                                                       | Certified Culinary Medicine Specialist | Practice cooking skills and mindful eating while gaining knowledge of the health benefits of seafood                                                      | Sheet pan Alaska halibut      |
| 4       | Exercise for Wellness         | Discover the mental and physical benefits of physical activity for cancer survivors and its role in cancer risk reduction | Occupational and Physical Therapist    | Directed practice in exercise activities using resistance bands adapted for your level of performance                                                     | Strawberry chia seed smoothie |
| 5       | Meditation & Mindful Eating   | Use mindfulness to better understand and improve eating behavior.                                                         | Licensed Clinical Social Worker        | Engage in a directed beginner's meditation and mindful eating fruit bowl exercise                                                                         | Pomegranate salsa             |
| 6       | Mindful Movement              | Experience the benefits of mindful movement and yoga as a mind-body exercise                                              | Certified Yoga Therapist               | Directed practice linking gentle movements with the breath followed by reflection                                                                         | Mango lassi overnight oats    |

|   |                                      |                                                                                                          |                                        |                                                                                                                             |                                             |
|---|--------------------------------------|----------------------------------------------------------------------------------------------------------|----------------------------------------|-----------------------------------------------------------------------------------------------------------------------------|---------------------------------------------|
| 7 | Virtual Teaching Kitchen #2          | Learn how plant-based eating benefits your health and the planet                                         | Certified Culinary Medicine Specialist | Practice cooking skills and mindful eating while gaining knowledge of the health benefits of plant proteins                 | Spinach and Goat cheese stuffed portobellos |
| 8 | Medical Management                   | Learn what to expect at post-treatment check-ups and screenings                                          | Medical Doctor                         | Identify strategies for effective communication with your healthcare team regarding managing long-term side effects         | Strawberry aqua frescas                     |
| 9 | Moving forward with Arts in Medicine | Learn how to combine mindfulness with the arts as a tool for healing, self-awareness and self-expression | Artist in Residence                    | Reflect and write a healthy intention on the Origami paper and fold each peace calmly and mindfully with focused meditation | Citrus Quinoa Avocado Salad                 |
